# Supplementary material for: Synthesis of enantiopure chloroalcohols by enzymatic kinetic resolution
Source: Royal Society of Chemistry journal article supplement (doi:10.1039/b613937j), 2006-12-11
Supplement: b613937j.pdf [file b613937j.pdf]

**Supplementary Information For:**  
**Synthesis of Enantiopure Chloroalcohols by Enzymatic Kinetic Resolution**

Robert M. Haak,<sup>a</sup> Chiara Tarabiono,<sup>b</sup> Dick B. Janssen,<sup>b</sup> Adriaan J. Minnaard,\*<sup>a</sup>  
Johannes G. de Vries\*<sup>a,c</sup> and Ben L. Feringa\*<sup>a</sup>

<sup>a</sup> *Department of Organic and Molecular Inorganic Chemistry, Stratingh Institute, University of Groningen, Nijenborgh 4, 9747 AG Groningen, the Netherlands.*

<sup>b</sup> *Department of Biochemistry, Groningen Biomolecular Sciences and Biotechnology Institute, Nijenborgh 4, 9747 AG Groningen, the Netherlands.*

<sup>c</sup> *DSM Research, LS-ACS&D, P.O. Box 18, 6160 MD Geleen, The Netherlands.*

**Table of contents**

|                                                                                 |    |
|---------------------------------------------------------------------------------|----|
| General procedure for the synthesis of substrates <b>1-7</b> .....              | 2  |
| <sup>1</sup> H and <sup>13</sup> C(APT) spectra for substrates <b>1-7</b> ..... | 3  |
| 1-Chloro-pent-3-en-2-ol ( <b>1</b> ) .....                                      | 3  |
| 1-chloro-hex-3-en-2-ol ( <b>2</b> ) .....                                       | 4  |
| 1-Chloro-oct-3-en-2-ol ( <b>3</b> ) .....                                       | 5  |
| 1-Chloro-3,5-octadien-2-ol ( <b>4</b> ) .....                                   | 6  |
| ( <i>E</i> )-1-Chloro-4-phenyl-but-3-en-2-ol ( <b>5</b> ) .....                 | 7  |
| 2-Chloro-1-furan-2-yl-ethanol ( <b>6</b> ) .....                                | 8  |
| 2-Chloro-1-thiophen-2-yl-ethanol ( <b>7</b> ) .....                             | 9  |
| References .....                                                                | 10 |

## General procedure for the synthesis of substrates 1-7

Substrates **1-7** were synthesized according to a literature procedure<sup>1</sup>.

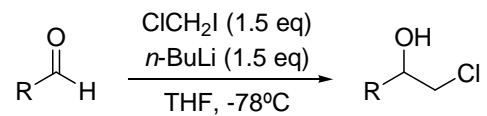

In a flamedried flask, a solution of aldehyde (typically 20 mmol) in freshly distilled THF (50 mL) was cooled down to  $-78^\circ\text{C}$ . Chloriodomethane (30 mmol) was then added, and subsequently *n*-butyllithium (30 mmol, 2.5 M in hexanes, 12 mL) was added dropwise to the solution over a period of 30 min. The reaction mixture was stirred until the starting material was fully converted (TLC), then quenched with  $\text{NH}_4\text{Cl}$  (sat.). After extraction with  $\text{Et}_2\text{O}$  (3x), the combined organic layers were washed with brine, dried over  $\text{Na}_2\text{SO}_4$ , filtered, and solvents evaporated. The crude products thus obtained were further purified by flash chromatography.

## $^1\text{H}$ and $^{13}\text{C}$ (APT) spectra for substrates 1-7

### 1-Chloro-pent-3-en-2-ol (1)<sup>2</sup>

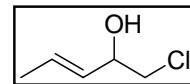

Prepared according to the general procedure, starting from 2.06 mL (1.75 g; 25 mmol) of crotonaldehyde. After flash chromatography over silica gel (pentane/Et<sub>2</sub>O 4:1) a colorless oil was obtained (2.21 g; 18.3 mmol; 73%).

$^1\text{H}$  NMR:

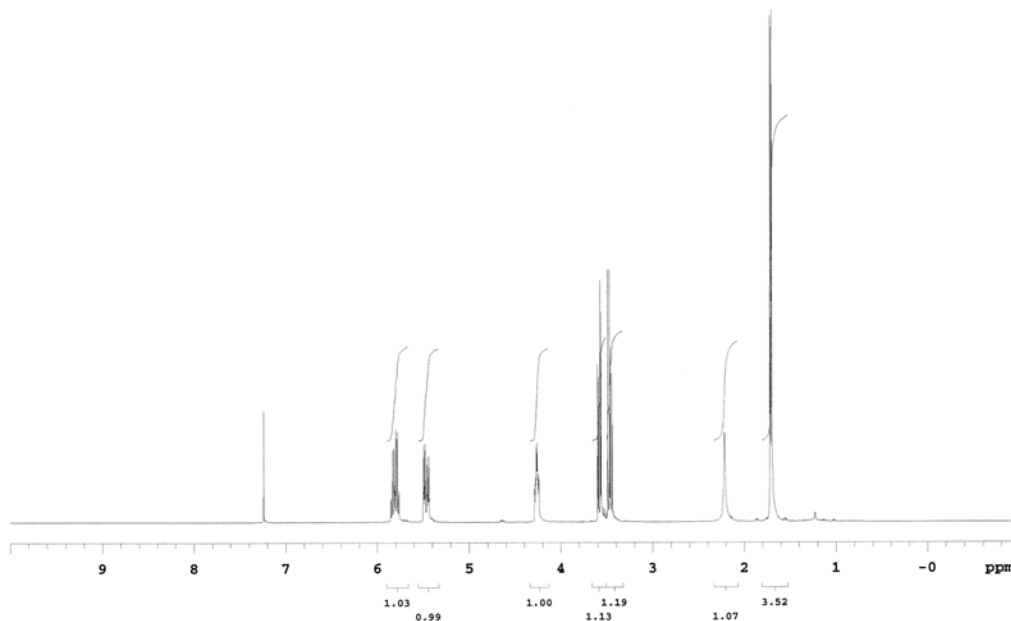

$^{13}\text{C}$  NMR (APT):

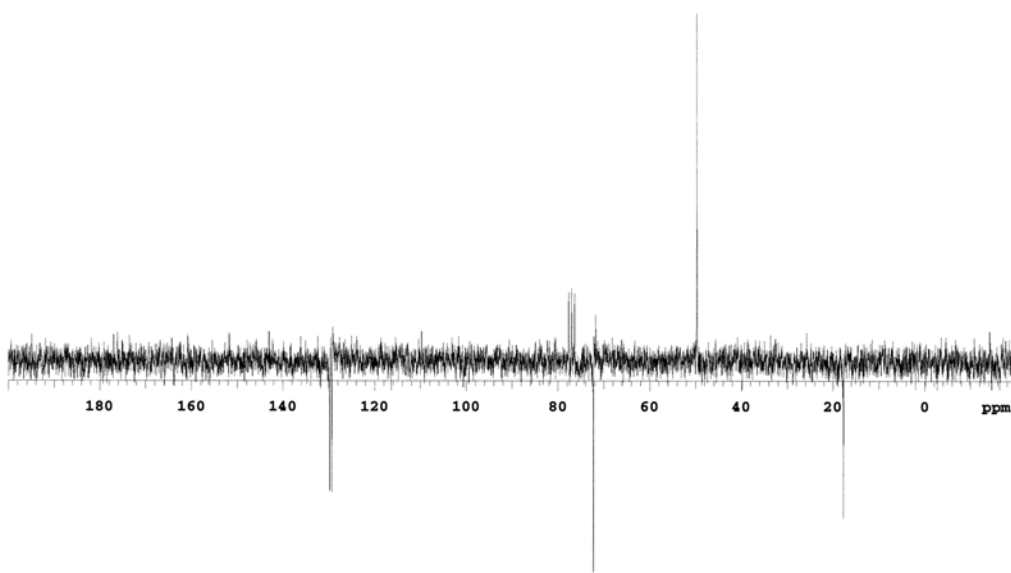

**1-chloro-hex-3-en-2-ol (2)**

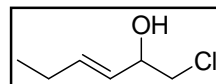

Prepared according to the general procedure, starting from 1.96 mL (1.68 g; 20 mmol) of pent-2-enal. After flash chromatography over silica gel (pentane/Et<sub>2</sub>O 6:1, gradient to 4:1) a colorless oil was obtained (1.77 g; 13.2 mmol; 66%).

<sup>1</sup>H NMR:

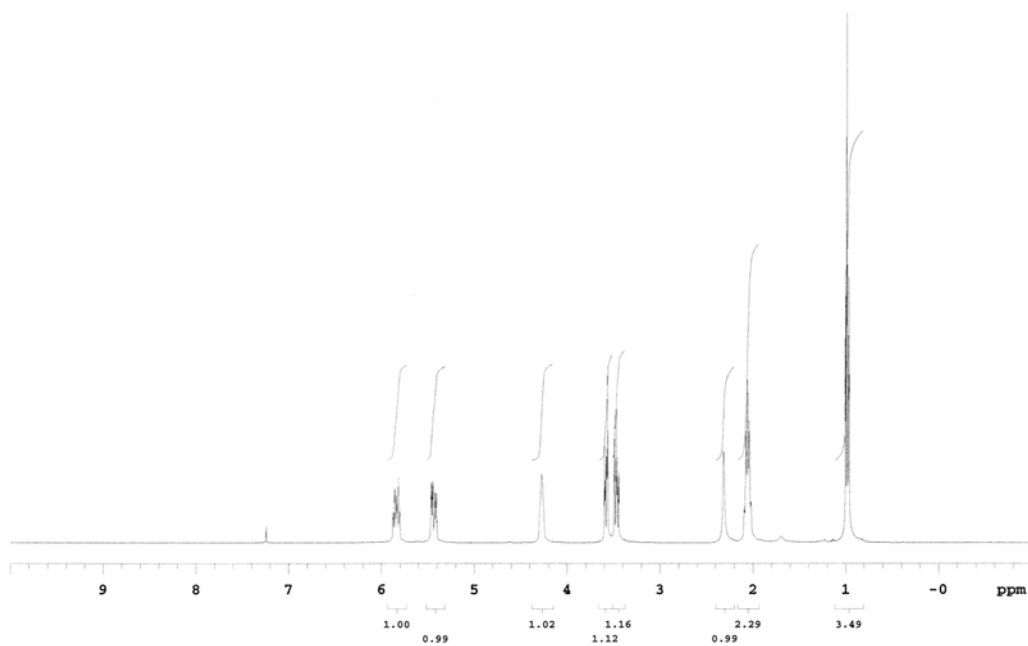

<sup>13</sup>C NMR (APT):

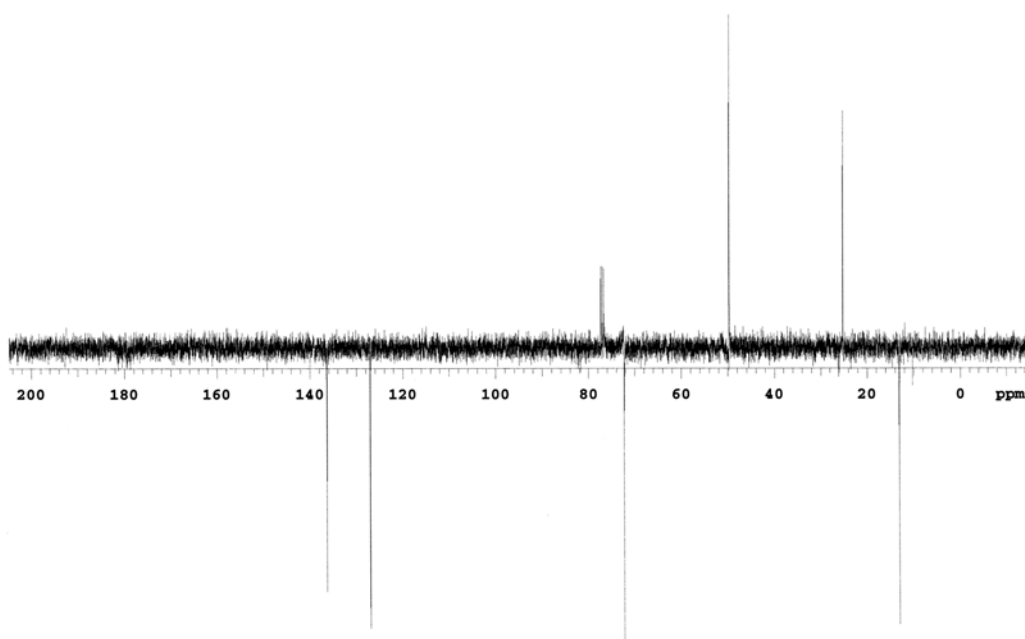

**1-Chloro-oct-3-en-2-ol (3)**<sup>1,3</sup>

Prepared according to the general procedure, starting from 1.31 mL (1.12 g; 10 mmol) of hept-2-enal. After flash chromatography over silica gel (pentane/Et<sub>2</sub>O 6:1; R<sub>f</sub> = 0.32) a colorless oil was obtained (903 mg; 5.55 mmol; 56%).

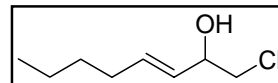

<sup>1</sup>H NMR:

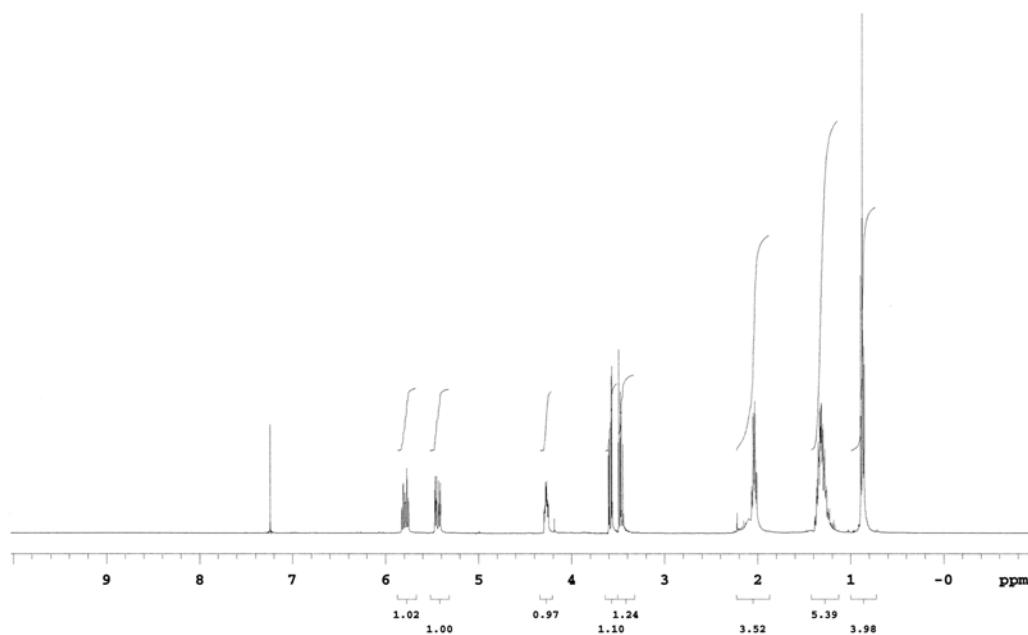

<sup>13</sup>C NMR (APT):

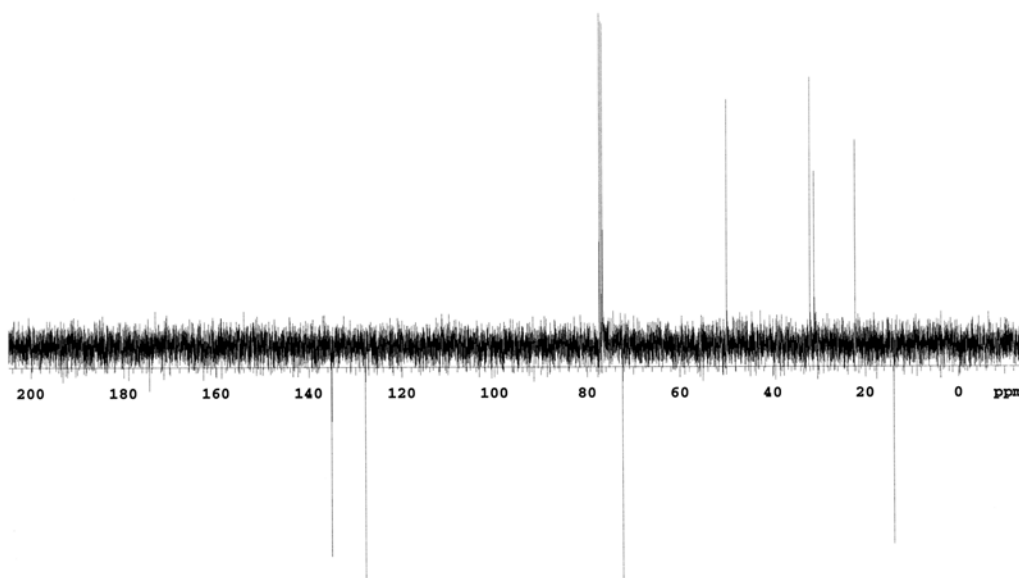

### 1-Chloro-3,5-octadien-2-ol (4)

Prepared according to the general procedure, starting from 1.25 mL (1.10 g; 10 mmol) of *trans,trans*-hepta-2,4-dienal. After flash chromatography over silica gel (pentane/Et<sub>2</sub>O 7:1; R<sub>f</sub> = 0.26) a colorless oil was obtained (1.29 g; 8.0 mmol; 79%).

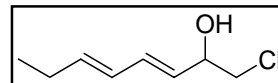

<sup>1</sup>H NMR:

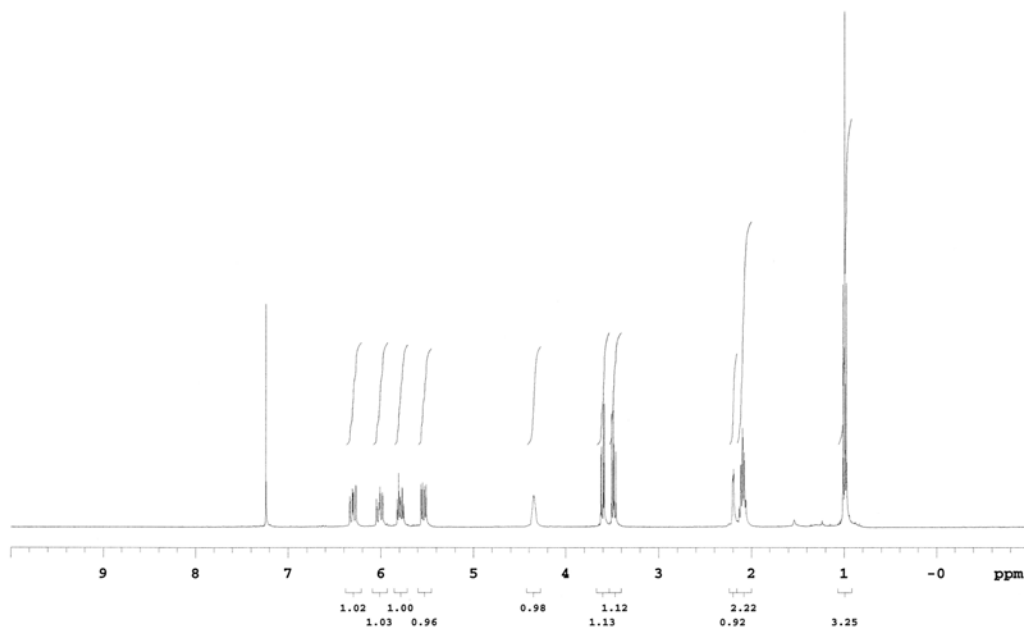

<sup>13</sup>C NMR (APT):

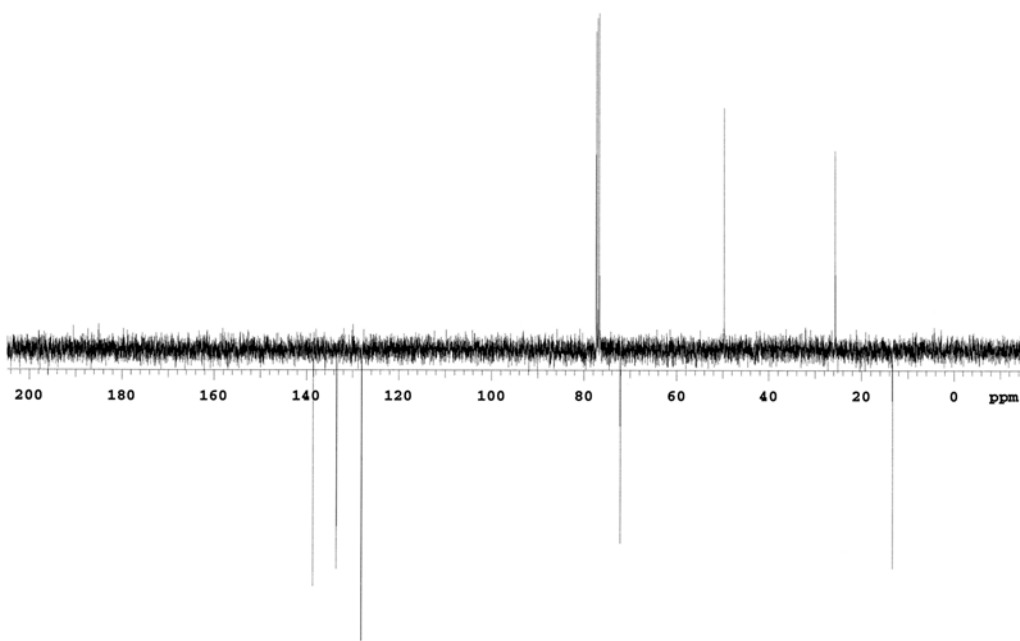

**(E)-1-Chloro-4-phenyl-but-3-en-2-ol (5)**<sup>1,3,4,5,6</sup>

Prepared according to the general procedure, starting from 2.52 mL (2.64 g; 20 mmol) of cinnamaldehyde. After flash chromatography over silica gel (pentane/Et<sub>2</sub>O 5:1; R<sub>f</sub> = 0.24) a colorless oil was obtained (2.34 g; 12.8 mmol; 64%), which crystallized upon standing.

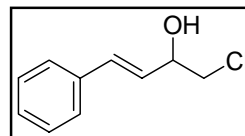

<sup>1</sup>H NMR:

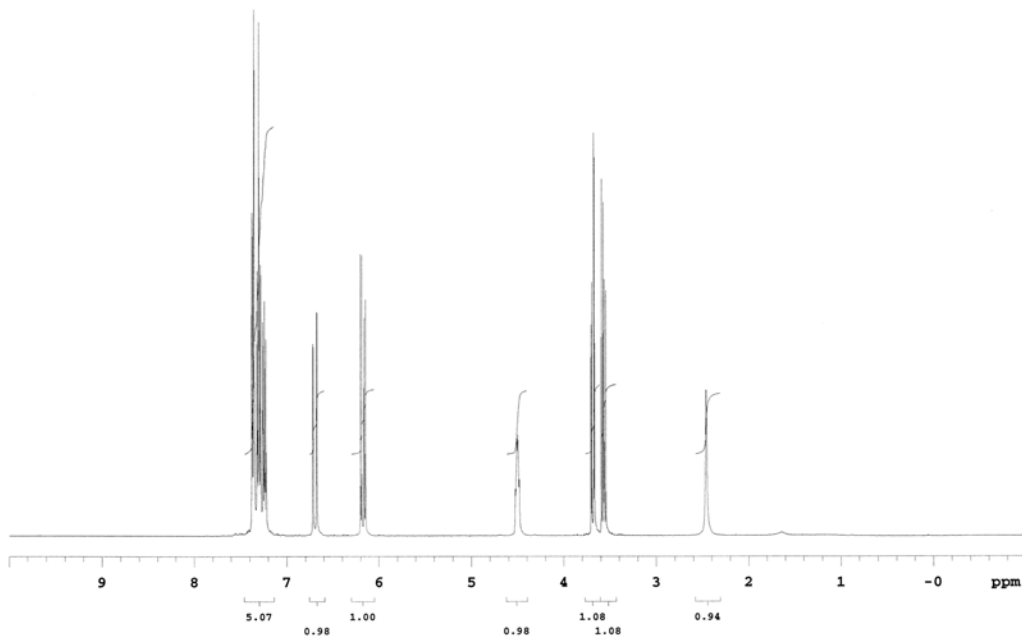

<sup>13</sup>C NMR (APT):

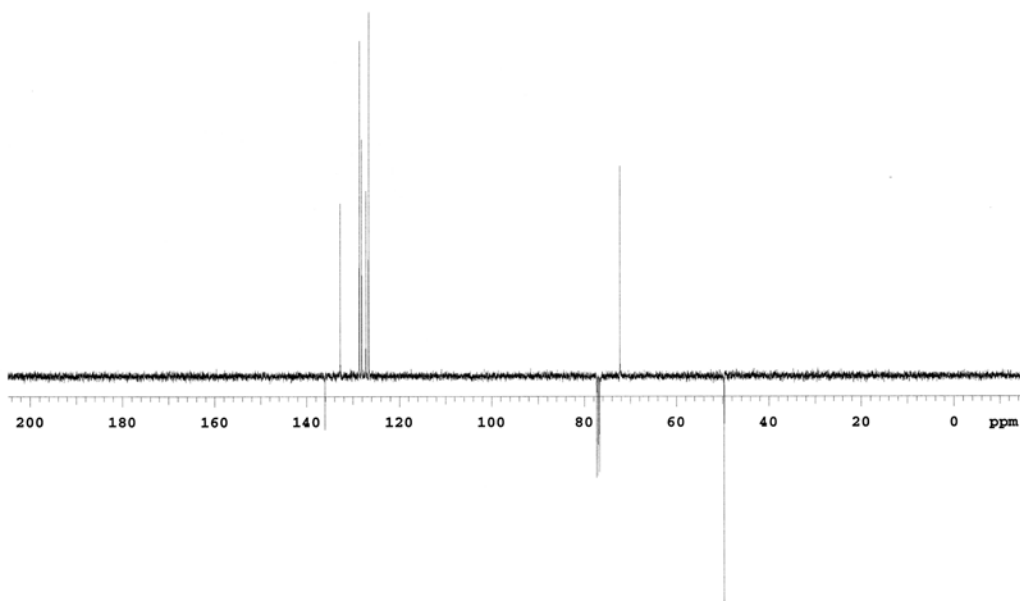

## 2-Chloro-1-furan-2-yl-ethanol (6)<sup>4,7</sup>

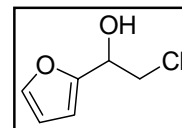

Prepared according to the general procedure, starting from 1.66 mL (1.92 g; 20 mmol) of freshly distilled furfural. After flash chromatography over silica gel (pentane/Et<sub>2</sub>O 4:1, gradient to 3:1; R<sub>f, 3:1</sub> = 0.40) a light yellow oil (1.87 g; 12.7 mmol; 64%) was obtained.

For the resolution on 2.3 g scale, different preparations were combined.

<sup>1</sup>H NMR:

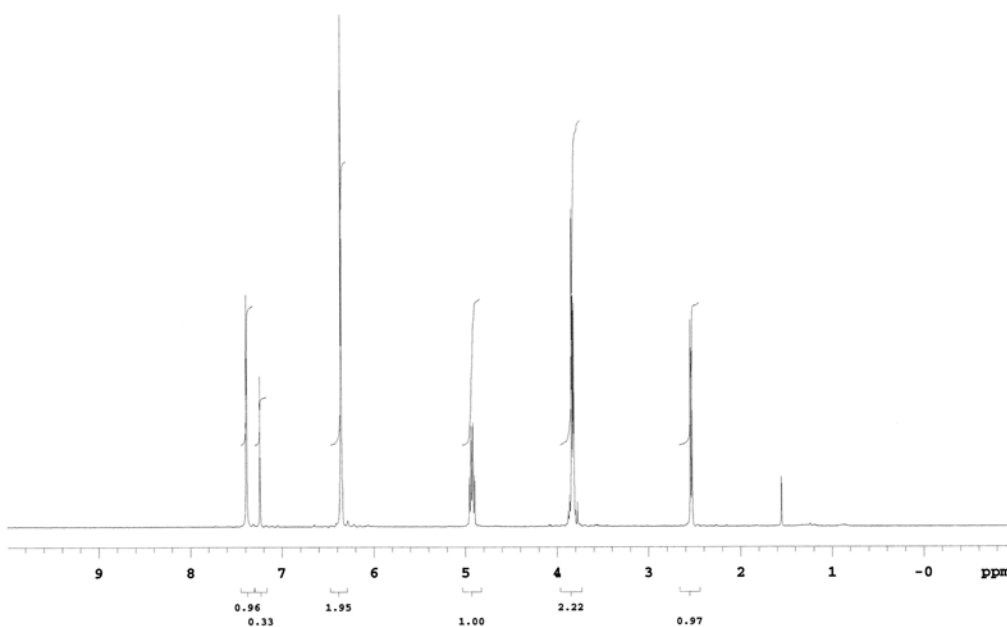

<sup>13</sup>C NMR (APT):

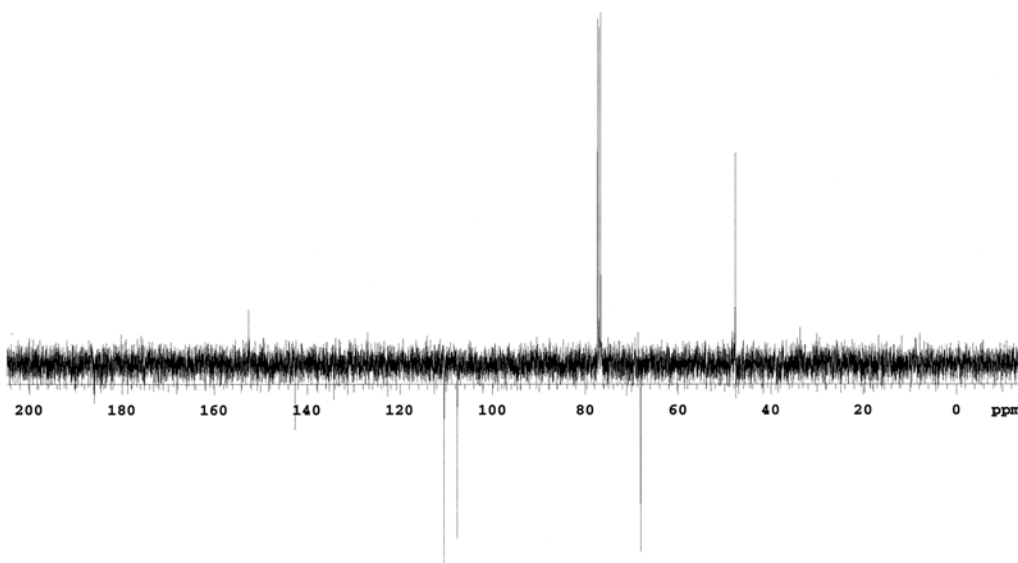



## 2-Chloro-1-(thiophen-2-yl)ethanol (7)<sup>4,8</sup>

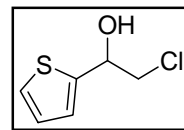

Prepared according to the general procedure, starting from 1.87 mL (2.24 g; 20 mmol) of 2-thiophene-carboxaldehyde. After flash chromatography over silica gel (pentane/Et<sub>2</sub>O 4:1; R<sub>f</sub> = 0.33) a colorless oil was obtained (2.86 g; 17.6 mmol; 88%).

For the 20 g scale resolution, this compound was prepared analogously (64%).

### <sup>1</sup>H NMR:

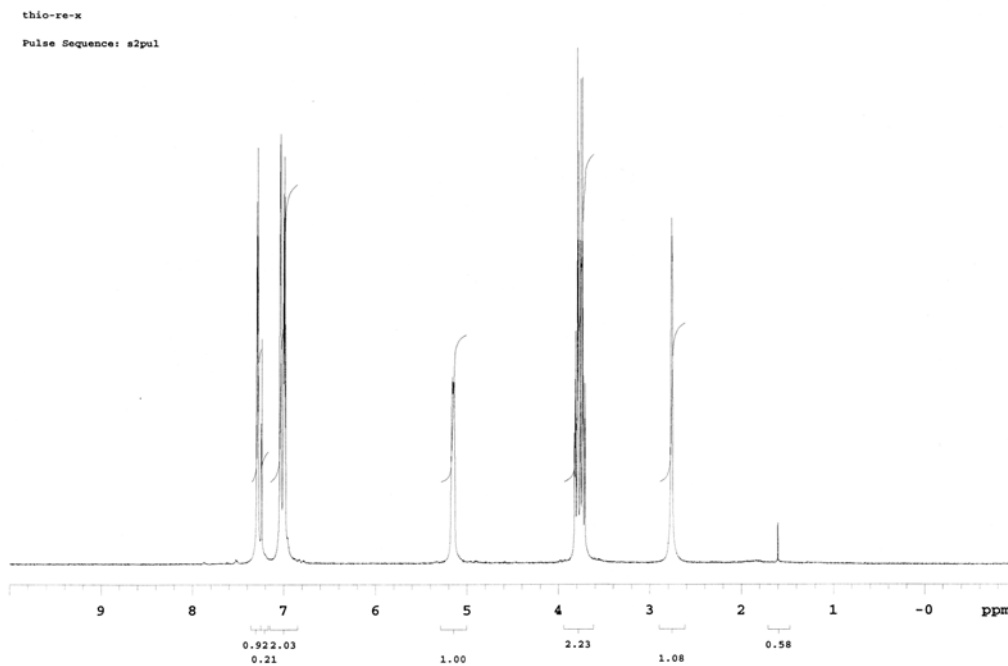

### <sup>13</sup>C NMR (APT):

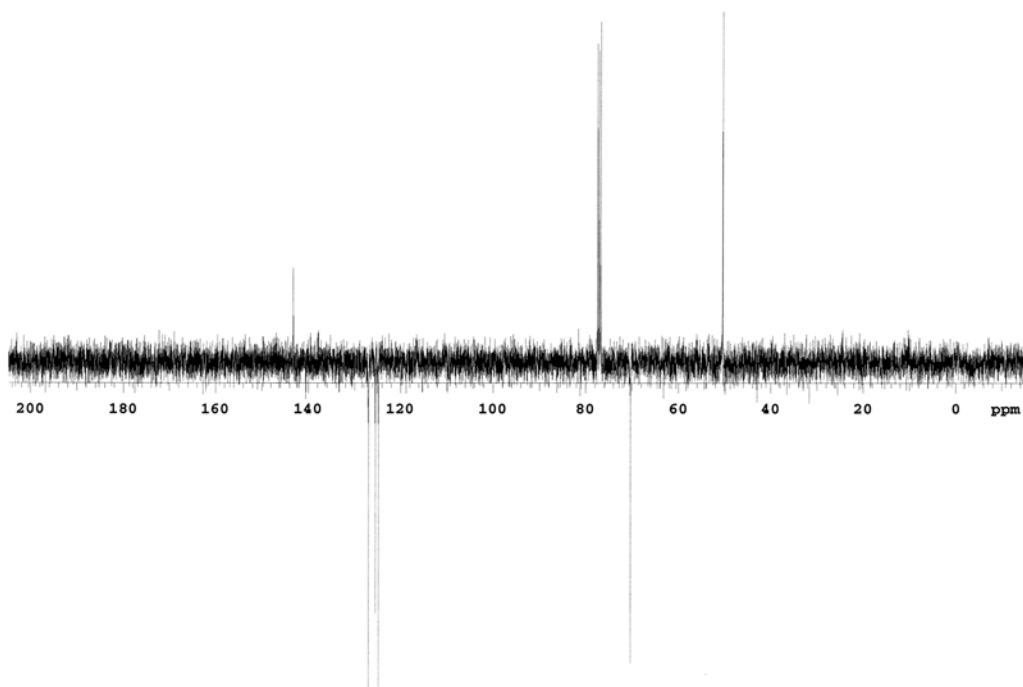

## References

- <sup>1</sup> M. Lautens, M. L. Maddess, E. L. O. Sauer and S. G. Ouellet, *Org. Lett.*, 2002, **4**, 83.
- <sup>2</sup> This compound has been reported in: Pudowik and Iwanow, *Zh. Obshch. Khim.*, 1956, **26**, 1910, Engl. Ed. 2129; Ponomarew *et al.*, *Zh. Obshch. Khim.*, 1957, **27**, 1226, Engl. Ed. 1309.
- <sup>3</sup> M. Lautens and M. L. Maddess, *Org. Lett.*, 2004, **6**, 1883.
- <sup>4</sup> T. Hamada, T. Torii, K. Izawa and T. Ikariya, *Tetrahedron*, 2004, **60**, 7411.
- <sup>5</sup> T. Schubert, W. Hummel and M. Mueller, *Angew. Chem. Int. Ed.*, 2002, **41**, 634.
- <sup>6</sup> O. Grummitt and R. M. Vance, *J. Am. Chem. Soc.*, 1950, **72**, 2669; I. E. Muskat and L. B. Grimsley, *J. Am. Chem. Soc.*, 1930, **52**, 1574.
- <sup>7</sup> Z. Gercek, D. Karakaya and A. S. Demir, *Tetrahedron: Asymmetry*, 2005, **16**, 1743.
- <sup>8</sup> A. Kamal, G. B. R. Khanna, R. Ramu and T. Krishnaji, *Tetrahedron Lett.*, 2003, **44**, 4783; C. Corral, V. Darias, M. P. Fernández-Tomé, R. Madroñero and J. Del Río, *J. Med. Chem.*, 1973, **16**, 882; H. Hopff and R. Wandeler, *Helv. Chim. Acta*, 1962, **45**, 982.
